# Supplementary material for: Dinuclear platinum(ii) 4,6-diphenyl-2,2′-bipyridine complexes tethered by a rigid bridging ligand: synthesis and photophysics in solution and in LB film
Source: Royal Society of Chemistry journal article supplement (doi:10.1039/c0dt00597e), 2010-01-01
Supplement: c0dt00597e.pdf [file c0dt00597e.pdf]

**Dinuclear Platinum(II) 4,6-Diphenyl-2,2'-bipyridine Complexes Tethered by  
Rigid Bridging Ligand: Synthesis and Photophysics in Solution and in LB  
Film**

Iswarya Mathew, Yunjing Li, Zhongjing Li, Wenfang Sun\*

*Department of Chemistry and Biochemistry, North Dakota State University, Fargo, ND*

*58108-6050*

---

\* Corresponding author. E-mail: [Wenfang.Sun@ndsu.edu](mailto:Wenfang.Sun@ndsu.edu); Fax: 1-701-231-8831; Phone:  
1-701-231-6254.

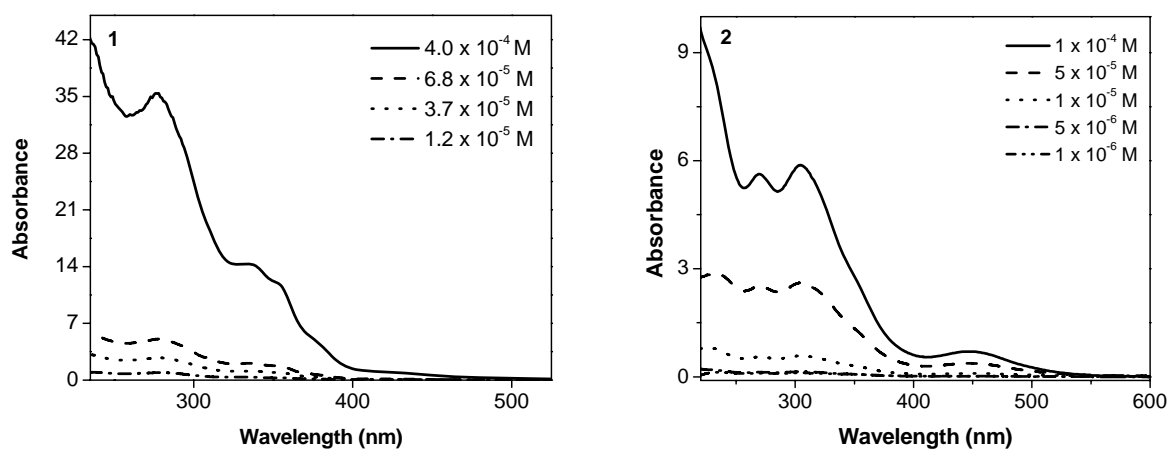

**Figure S1.** Concentration-dependent UV-vis absorption spectra of **1** and **2** in acetonitrile.

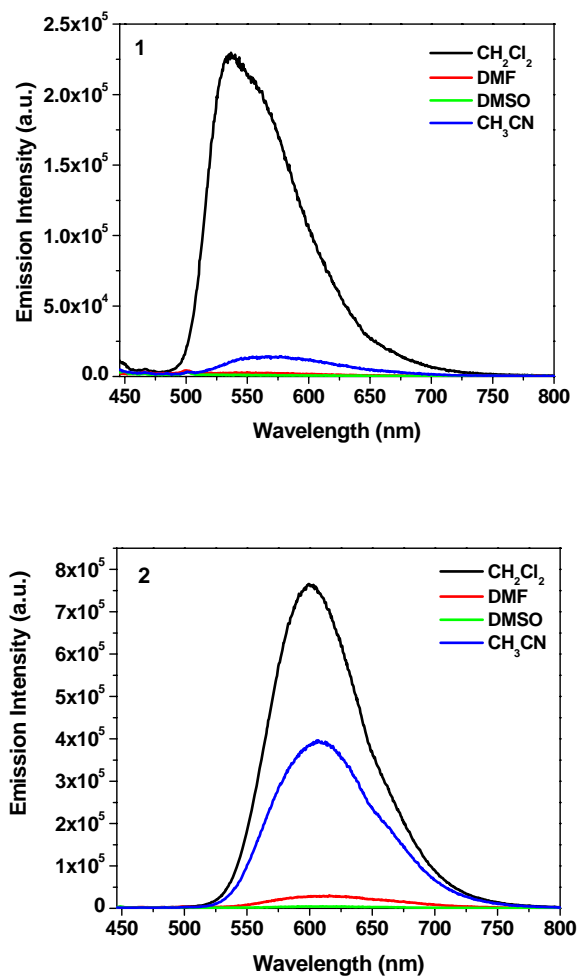

**Figure S2.** Emission spectra of **1** and **2** in different solvents.  $\lambda_{\text{ex}} = 436 \text{ nm}$ ,  $A_{436 \text{ nm}} \approx 0.07$  in a 1-cm cuvette.

**Table S1.** Emission parameters for **1** and **2** in different solvents at room temperature <sup>a</sup>

| Complex  | $\lambda_{em}/nm$ ( $\tau_{em}/ns$ ; $\Phi_{em}$ ) |                    |                  |                 |
|----------|----------------------------------------------------|--------------------|------------------|-----------------|
|          | CH <sub>2</sub> Cl <sub>2</sub>                    | CH <sub>3</sub> CN | DMF              | DMSO            |
| <b>1</b> | 537 (3040; 0.16)                                   | 567 (80; 0.01)     | 544 (-; -)       | --              |
| <b>2</b> | 600 (3630; 0.35)                                   | 607 (2670; 0.25)   | 613 (230; 0.023) | 606 (20; 0.005) |

<sup>a</sup> Measured in a solution with  $A \approx 0.07$  at 436 nm in a 1-cm cuvette.

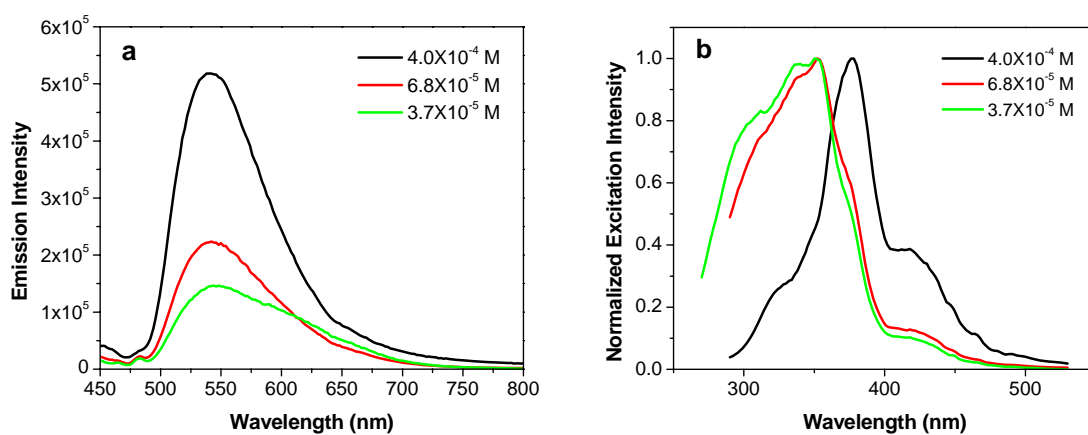

**Figure S3.** The emission (a) and excitation (b) spectra of **1** in CH<sub>3</sub>CN at different concentrations at R.T.  $\lambda_{\text{ex}} = 425$  nm. The excitation spectra were monitored at the emission band maximum of 530 nm.

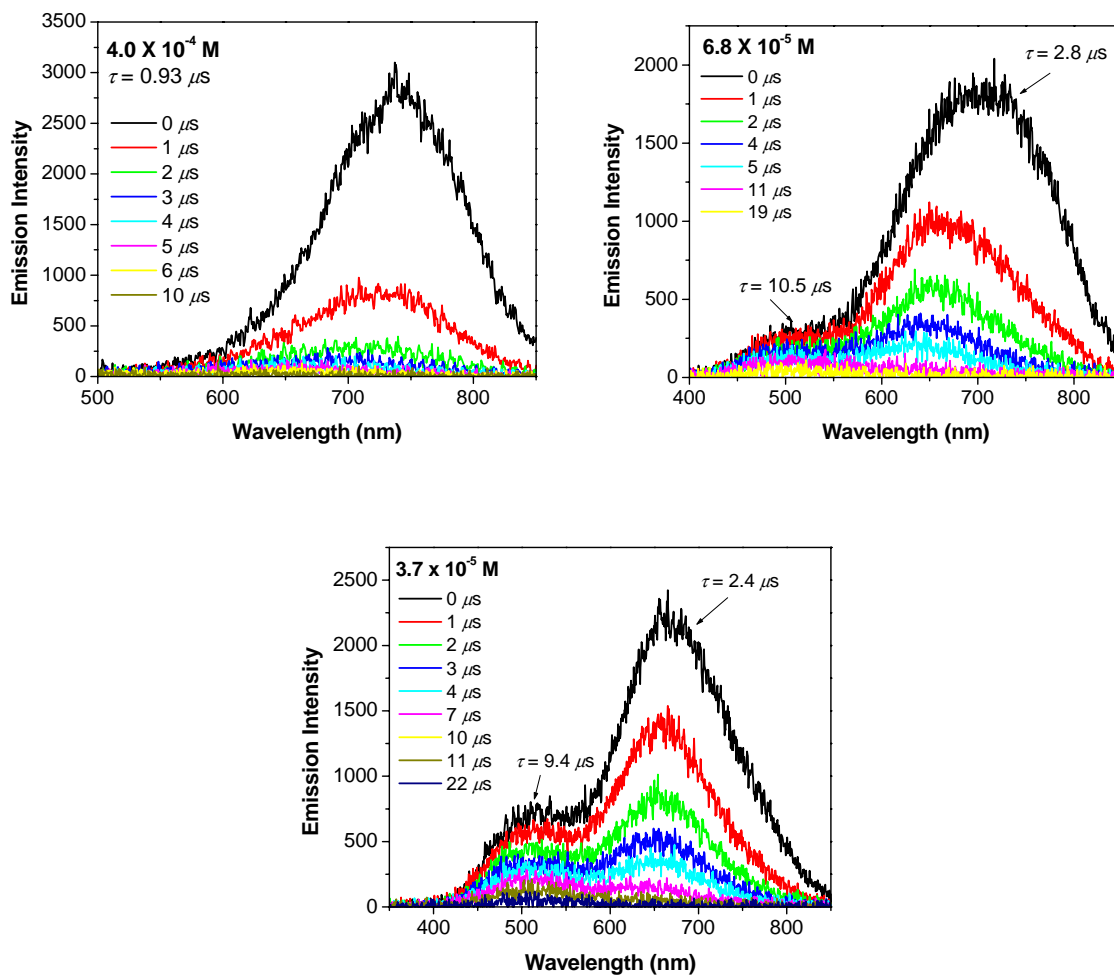

**Figure S4.** Time-resolved emission spectra of **1** at different concentrations of  $\text{CH}_3\text{CN}$  glassy solution at 77 K.  $\lambda_{\text{ex}} = 355 \text{ nm}$ .

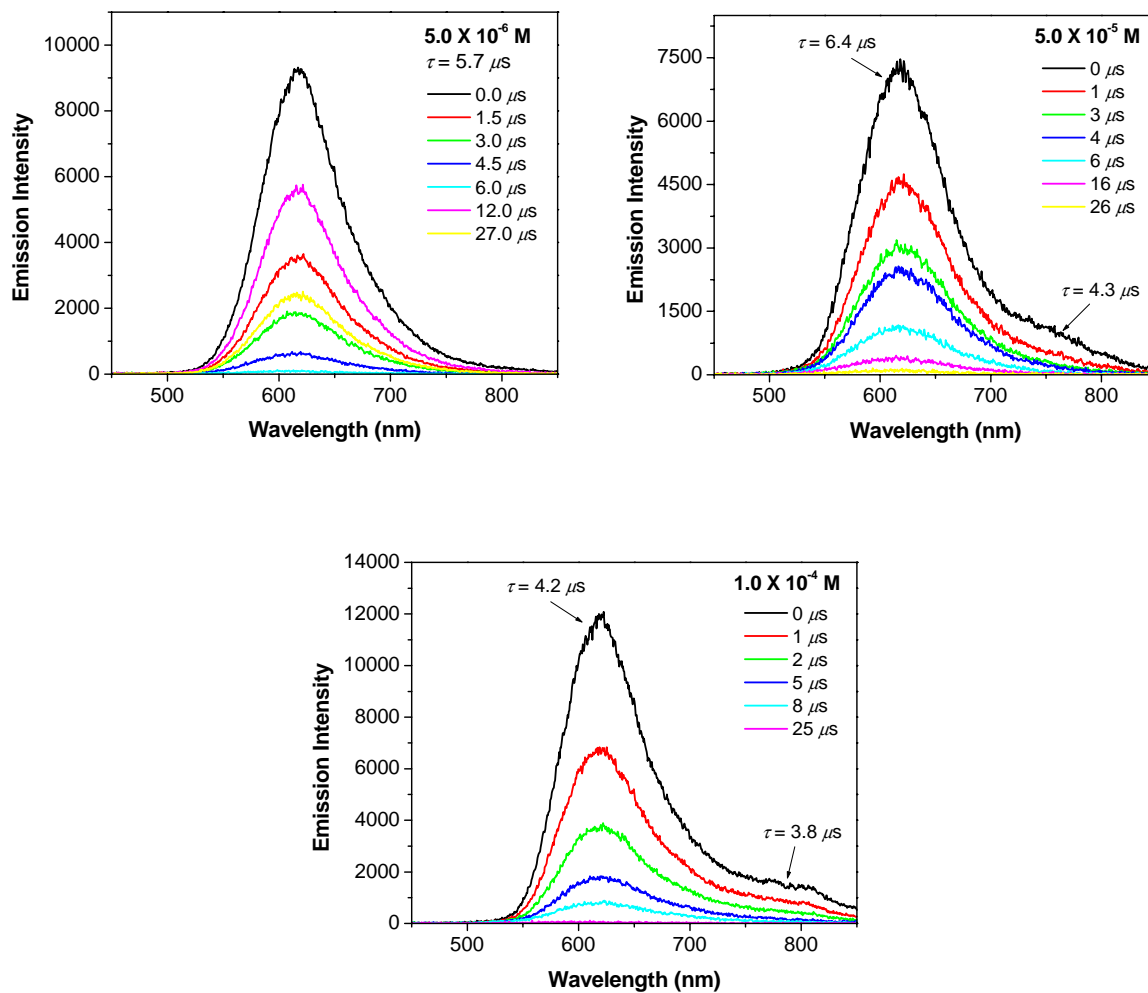

**Figure S5.** Time-resolved emission spectra of **2** at different concentrations of CH<sub>3</sub>CN glassy solution at 77 K.  $\lambda_{\text{ex}} = 355 \text{ nm}$ .
